# Supplementary material for: Mobility and separation of linear and branched C5 alkanes in UiO-66 (Zr) probed by 2H NMR and MD simulations
Source: Royal Society of Chemistry journal article supplement (doi:10.1039/d3cp02601a), 2023-01-01
Supplement: d3cp02601a1.pdf [file d3cp02601a1.pdf]

## Supporting Information

### Mobility and separation of linear and branched C<sub>5</sub> alkanes in UiO-66 (Zr) probed by <sup>2</sup>H NMR and MD simulations

Alexander E. Khudozhitkov,<sup>a,b</sup> Mikhail S. Plekhanov,<sup>b</sup> Sergei S. Arzumanov,<sup>a</sup> Daniil I. Kolokolov,<sup>\*a</sup> and Alexander G. Stepanov<sup>\*a</sup>

<sup>a</sup>*Boreskov Institute of Catalysis, Siberian Branch of Russian Academy of Sciences, Prospekt Akademika Lavrentieva 5, Novosibirsk 630090, Russia.*

<sup>b</sup>*Novosibirsk State University, Pirogova Street 2, Novosibirsk 630090, Russia*  
*e-mail: kdi@catalysis.ru; stepanov@catalysis.ru*

#### Material synthesis and characterization

A typical synthetic procedure involved mixing under Argon atmosphere of 0.965 g of ZrCl<sub>4</sub> with 1.37 g of Terephthalic Acid in 24 mL of dimethylformamide (DMF) solvent with 0.64 mL of aqueous solution of HCl acid (37%) within a Teflon-lined steel Parr-autoclave. After mixing for 1 hour and sealing, the reactor was heated at 220 °C for 16 hours with 1 hour to heat up. After opening the reaction, the white power was collected by filtration. The product was rinsed 3 times with DMF. The resulting powder was washed in DMF (125 ml) at 80 °C for 9 hours and then filtered via hot filtration. The procedure was repeated twice with a fresh solvent. Then the DMF was exchange with MeOH by washing in MeOH (100 mL) for 12 hours at normal conditions. After filtration the resulting UiO-66 powder was dried in an oven at 100 °C. To obtain dehydroxylated form the material was activated at 250 °C.

The resulting material was studied by powder SEM, XRD and nitrogen porosimetry:

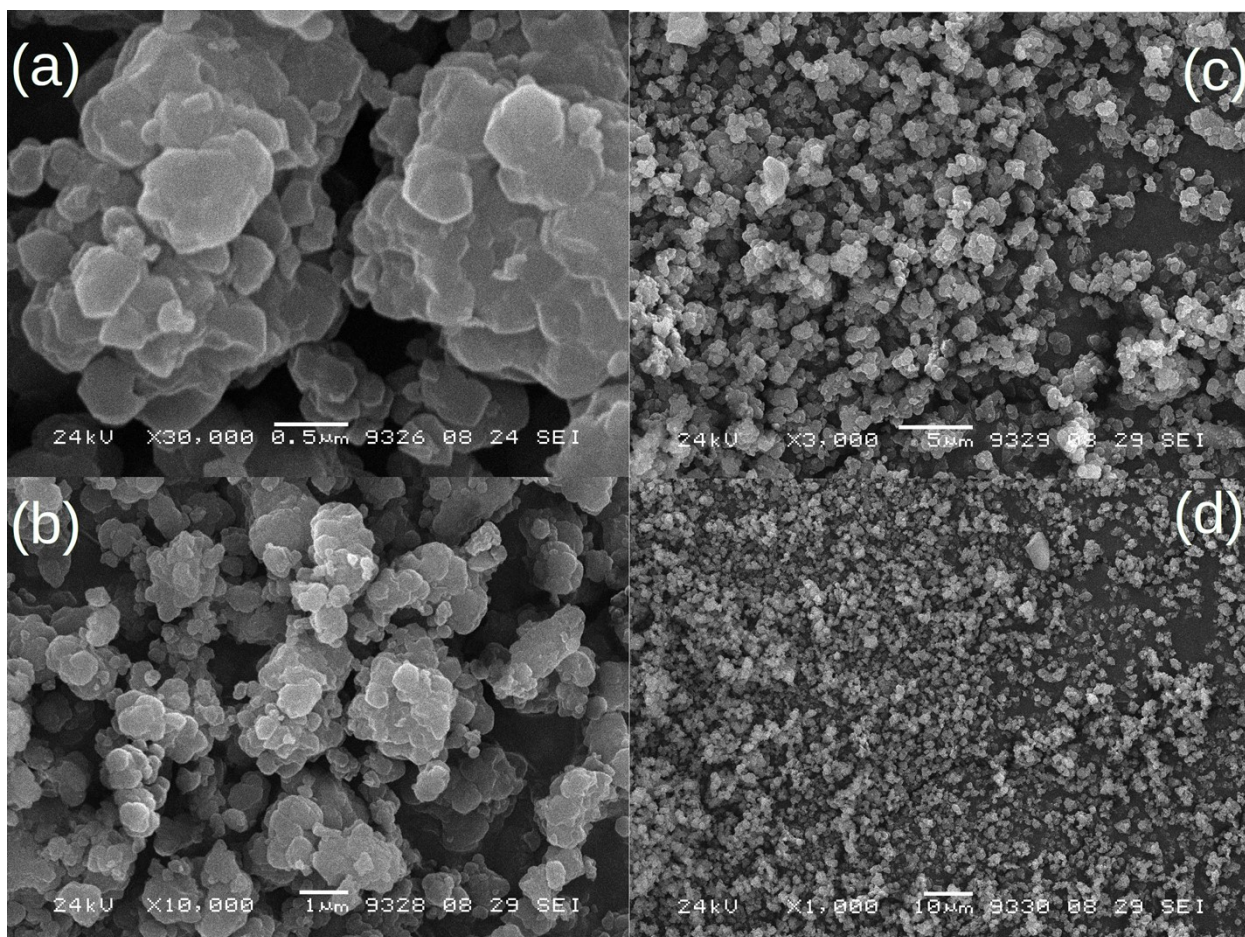

**Figure S1.** (a-d) SEM images of the synthesized and dried UiO-66 compound.

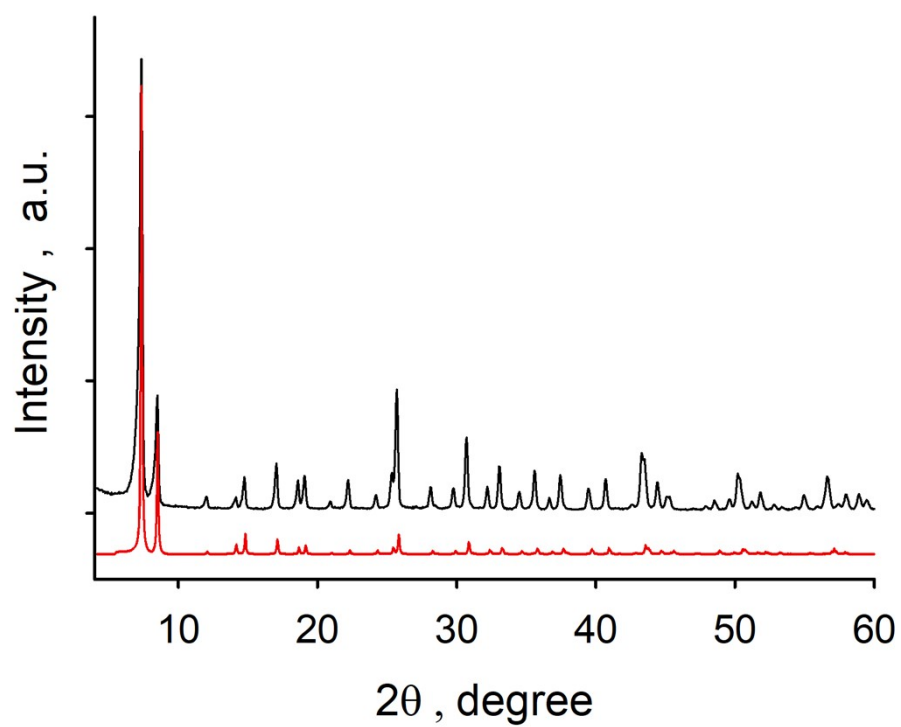

**Figure S2.** Experimental (black) and simulated (red) XRD patterns of the synthesized and dried UiO-66 compound.

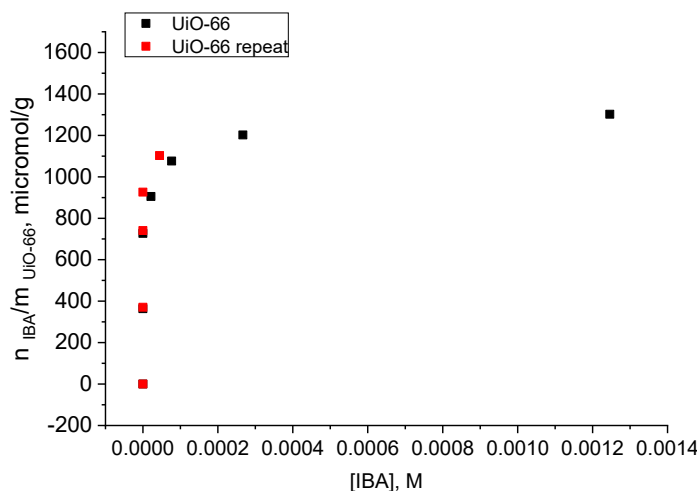

**Figure S3.** Nitrogen adsorption isotherms and textural characteristics for for UiO-66 (Zr) activated at 250 °C.  $S_{\text{BET}} = 1145 \text{ m}^2/\text{g}$ ,  $S_{\text{ext}} = 33 \text{ m}^2/\text{g}$ ,  $V_{\text{total}} = 0.46 \text{ cm}^3/\text{g}$ ,  $V_{\text{micro}} = 0.42 \text{ cm}^3/\text{g}$ .

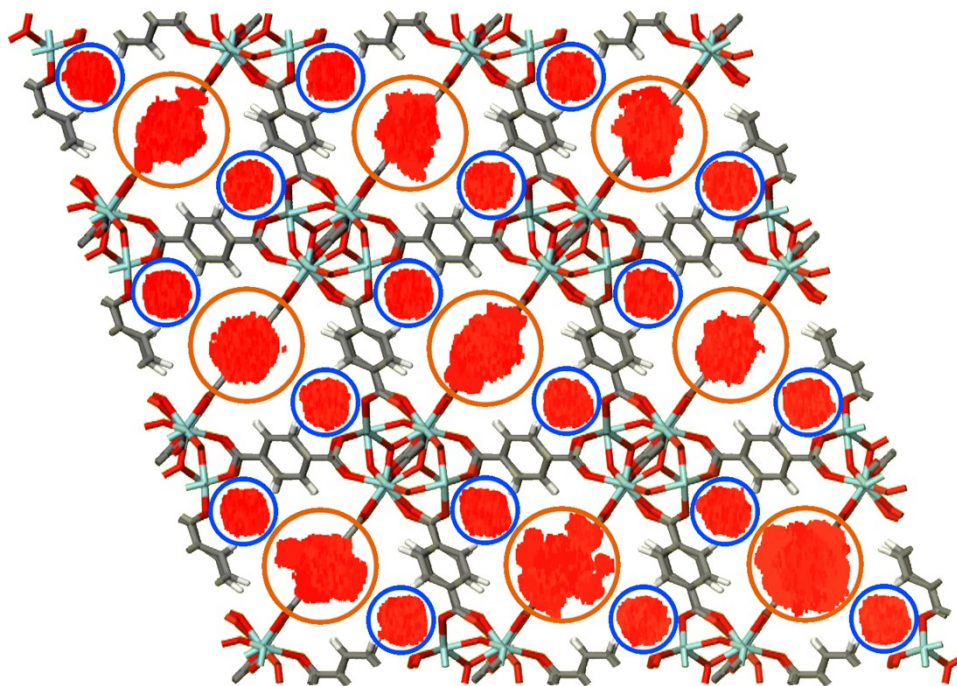

**Figure S4.** Localization of adsorbed pentane molecules in dehydroxylated UiO-66 at 100 kPa and 373 K. Orange circles depict position of octahedral cages, blue circles depict the position of tetrahedral cages.

### NMR experiment

$^2\text{H}$  NMR spectra were obtained by a Fourier transform of a quadrature-detected and phase-cycled quadrupole echo (quadecho) after two phase-alternating  $90^\circ$ -pulses in the pulse sequence ( $90^\circ_{\varphi_1} - d_6 - 90^\circ_{\varphi_2} - d_7 - \text{acquisition}_{\varphi_3} - t$ ). Time delay between pulses  $d_6 = 20 \mu\text{s}$ . Second time delay  $d_7 = 18.5 \mu\text{s}$  was adjusted in order to start the acquisition of echo signal from the maximum. Inversion-recovery (IR) experiments for measurements of spin-lattice relaxation times ( $T_1$ ) were carried out using the pulse sequence  $180^\circ_{\varphi_0} - v_d - 90^\circ_{\varphi_1} - d_6 - 90^\circ_{\varphi_2} - d_7 - \text{acquisition}_{\varphi_3} - t$ . The variable delay between  $180^\circ$  and the  $90^\circ$ -pulses was changed in 10 steps from 1 ms to approximately  $5T_1$ .

Spin-spin relaxation time ( $T_2$ ) was measured by a Carr-Purcell-Meiboom-Gill pulse sequence:  $90^\circ_{\varphi_1} - (d20 - 180^\circ_{\varphi_2} - d20)_n - d20 - 180^\circ_{\varphi_2} - d21 - \text{acquisition}_{\varphi_3} - t$ . Time delay  $d20 = 200 \mu\text{s}$  was kept fixed for all temperatures. Time delay  $d21$  was adjusted in order to start the acquisition of echo signal from the maximum. Phase cycles for all pulse sequences are shown in Table S1.

**Table S1.** Phase cycles used for NMR experiment.

|          | $\varphi_0$ | $\varphi_1$         | $\varphi_2$         | $\varphi_3$         |
|----------|-------------|---------------------|---------------------|---------------------|
| Quadecho | -           | x -x -x x           | y y -y -y           | x -x -x x           |
| IR       | x -x -x x   | x -x -x x           | y y -y -y           | x -x -x x           |
| CPMG     | -           | x x -x -x y y -y -y | y -y y -y x -x x -x | x x -x -x y y -y -y |

**Table S2** Langmuir adsorption isotherm parameters of pentane isomers in UiO-66 at 373 K.

|                        | Isopentane | <i>n</i> -Pentane |
|------------------------|------------|-------------------|
| $a_1$                  | 3.3        | 2.1               |
| $b_1, \text{kPa}^{-1}$ | 2.4        | 0.15              |
| $a_2$                  | 9          | 11.2              |
| $b_2, \text{kPa}^{-1}$ | 100        | 15.5              |
